# Supplementary material for: Abnormal Mechanics Relate to Myocardial Fibrosis and Ventricular Arrhythmias in Patients With Mitral Valve Prolapse
Source: PubMed Central journal article supplement — Circ Cardiovasc Imaging. 2022 Dec 2;16(4):e014963. doi: 10.1161/CIRCIMAGING.122.014963 (PMC10108844; doi:10.1161/circimaging.122.014963), 2022-12-02
Supplement: hci-16-e014963-s002.pdf [file hci-16-e014963-s002.pdf]

# SUPPLEMENTAL MATERIAL

## Nagata, MVP-Related Mechanics, Fibrosis, and Arrhythmia

Figure S1. Inclusion and exclusion flow diagram.

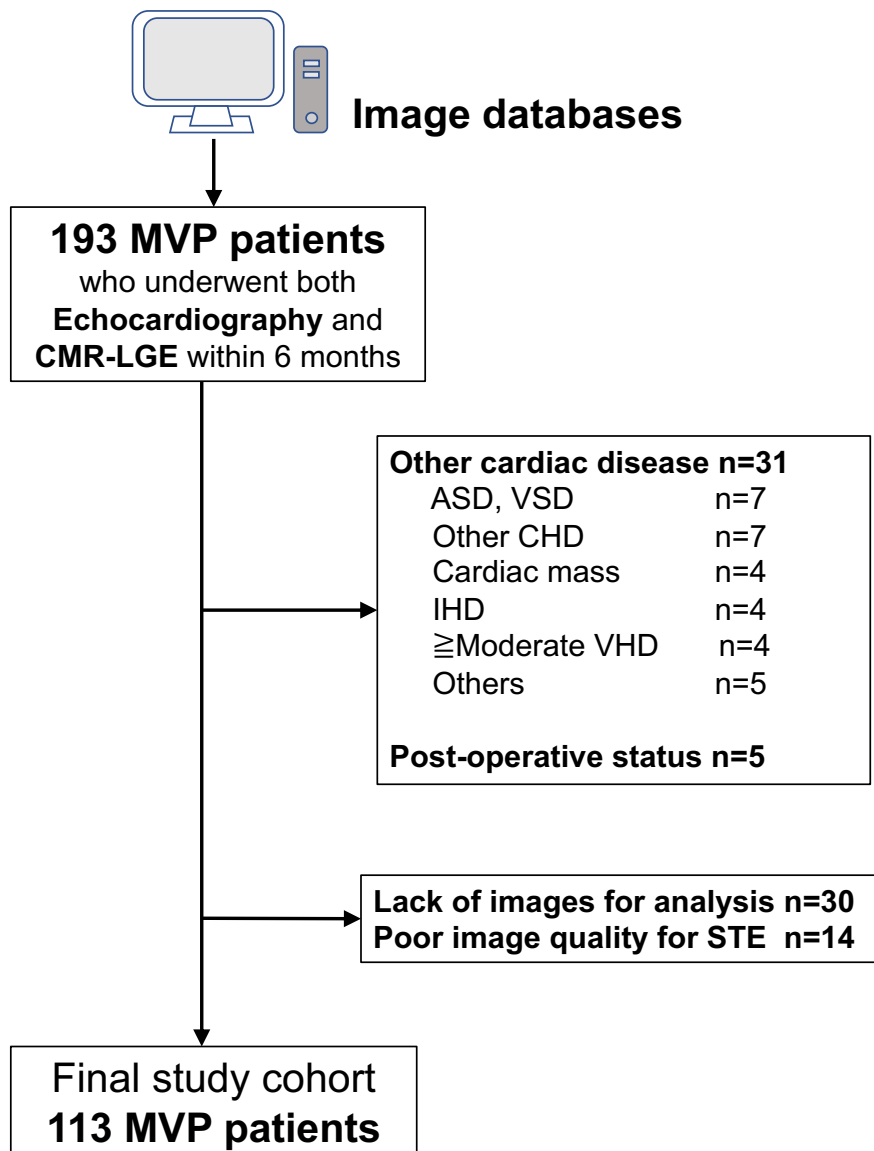

Figure S2. Speckle-tracking echocardiography on the myocardium with the mitral annular disjunction.

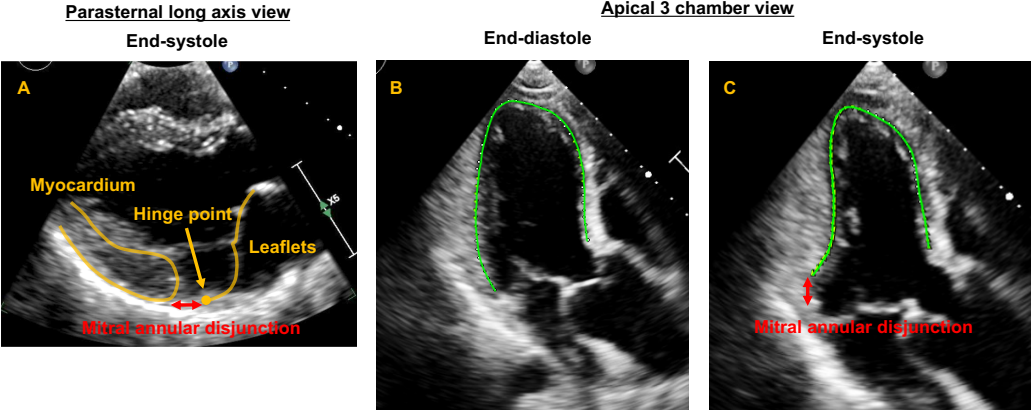

Figure S3. Relation of fibrosis to mitral regurgitation.

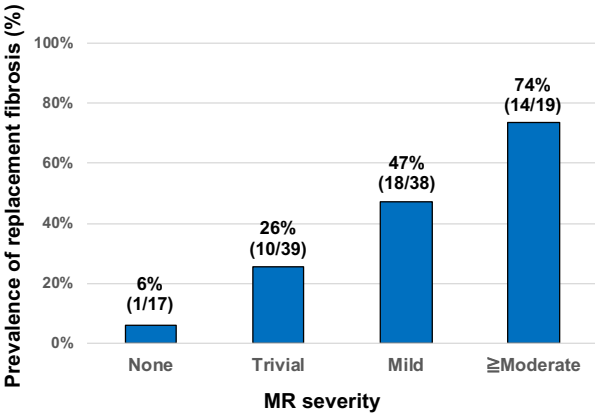

Figure S4. Echocardiographic, strain, and late gadolinium enhancement images in representative cases according to presence of mitral valve prolapse, double-peak strain pattern, and fibrosis.

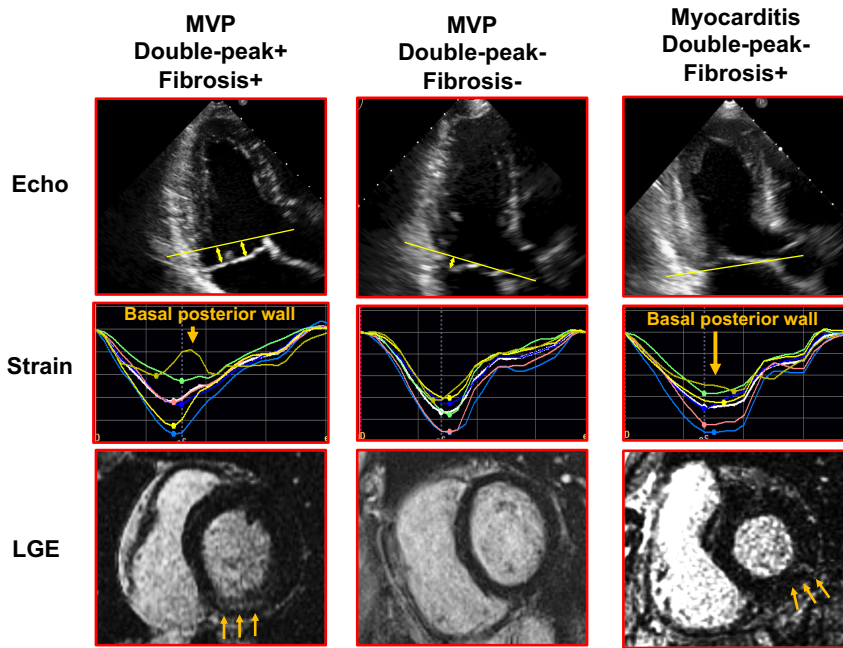

Figure S5. Kaplan-Meier curve for arrhythmic events in subgroups.

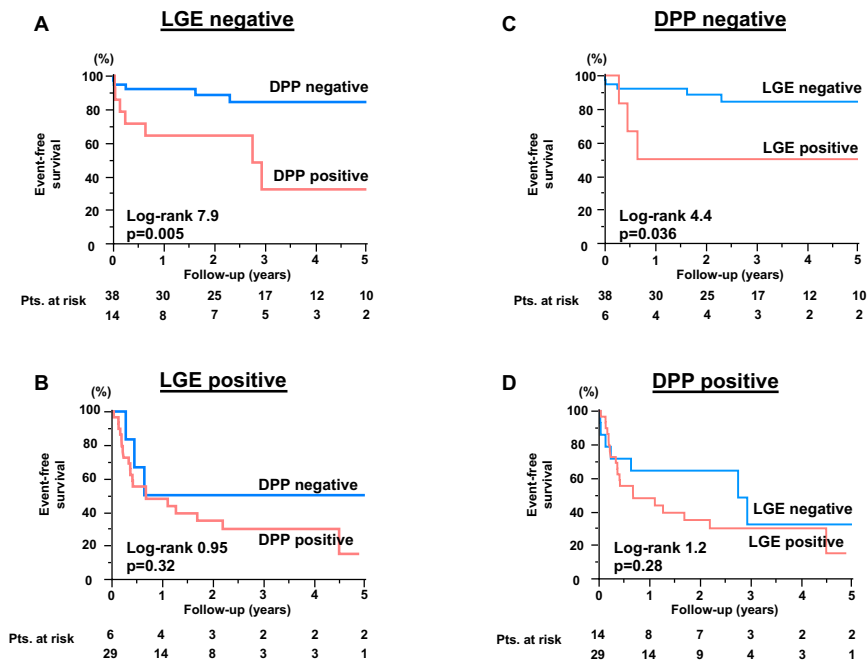

Figure S6. Comparison of mitral valve prolapse-related parameters between patients with versus without double-peak strain pattern.

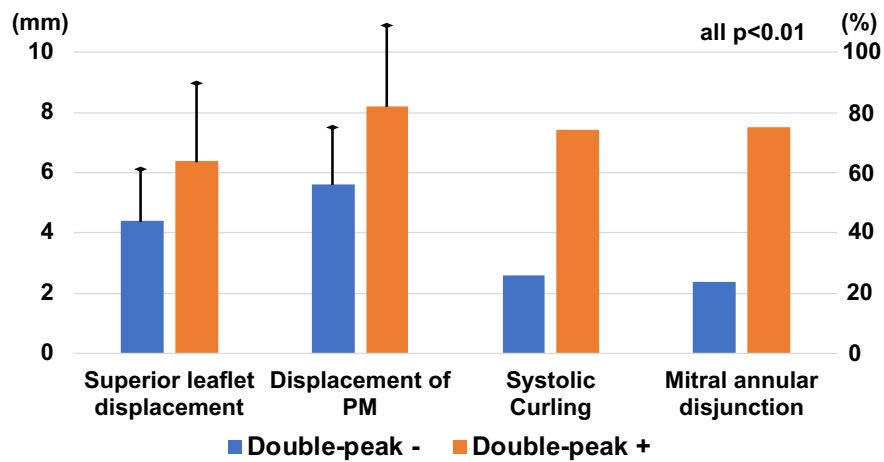

### Supplemental Figures legends

Figure S1. Inclusion and exclusion flow diagram.

ASD, atrial septal defect; CHD, congenital heart disease; CMR-LGE, cardiac magnetic resonance-late gadolinium enhancement; IHD, ischemic heart disease; MVP, mitral valve prolapse; STE, speckle-tracking echocardiography; VHD, valve heart disease

Figure S2. Speckle-tracking echocardiography on the myocardium with the mitral annular disjunction.

Panel A demonstrated the parasternal long axis view in a patient with the mitral annular disjunction. The posterior myocardium is detached from the hinge point of the posterior leaflet (the posterior mitral annulus), showing the mitral annular disjunction (bidirectional arrow). Panel B shows the tracing line (green line) of endocardium at end-diastole in the 3-chamber view. Panel C shows the tracing line (green line) of the endocardium at end-systole without including the gap between the end of the myocardium and the posterior annulus (mitral annular disjunction).

Figure S3. Relation of fibrosis to mitral regurgitation.

The greater mitral regurgitation patients had, the more frequently they had fibrosis.

MR, mitral regurgitation

Figure S4. Echocardiographic, strain, and late gadolinium enhancement images in representative cases according to presence of mitral valve prolapse, double-peak strain pattern, and fibrosis.

*Left:* Patient with MVP (upper), double-peak strain pattern (middle), and fibrosis in basal inferior to posterior wall (bottom). *Middle:* Patient with MVP, normal strain pattern, and no fibrosis.

*Right:* Non-MVP patient with basal posterior wall fibrosis. Middle panels show regional strain curves in apical 3-chamber view.

LGE, late gadolinium enhancement

Figure S5. Kaplan-Meier curve for arrhythmic events in subgroups.

Double-peak strain pattern (DPP) distinguishes patients with from those without arrhythmic events in mitral valve prolapse (MVP) patient group without fibrosis (A), while it does not in the patient group with fibrosis (B). Late gadolinium enhancement evaluation stratifies patients according to the risk of arrhythmic events in MVP patient group without DPP (C), while it does not in the patient group with DPP (D).

DPP = double-peak strain pattern

Figure S6. Comparison of mitral valve prolapse-related parameters between patients with versus without double-peak strain pattern.

Mitral valve prolapse patients with double-peak strain pattern had greater superior displacement of leaflet and papillary muscle and higher prevalence of curling and mitral annular disjunction than patients without double-peak strain pattern.

PM, papillary muscle

## Supplemental Tables

Table S1. Comparison of strain in mitral valve prolapse (MVP) vs. Non-MVP with basal inferior-lateral fibrosis.

|                               | MVP with<br>fibrosis<br>n=43 | MVP without<br>fibrosis<br>n=70 | Non-MVP with<br>fibrosis<br>n=20 | p value |
|-------------------------------|------------------------------|---------------------------------|----------------------------------|---------|
| Age, yrs                      | 58±16                        | 53±17                           | 48±18                            | 0.088   |
| Sex, male                     | 23 (53%)                     | 376 (51%)                       | 14 (70%)                         | 0.32    |
| LVEDV, ml                     | 153±43                       | 149±50                          | 152±28                           | 0.85    |
| LVESV, ml                     | 61±19                        | 59±25*                          | 74±19                            | 0.039   |
| LVEF, %                       | 61±6*                        | 61±7*                           | 52±9                             | <0.001  |
| Global longitudinal strain, % | 22.4±3.9*                    | 22.9±3.2*                       | 18.7±3.5                         | <0.001  |
| Mechanical dispersion         | 5.8±1.7†                     | 4.5±1.3*                        | 6.3±2.5                          | <0.001  |
| Double-peak strain pattern    | 35 (81%)*†                   | 18 (26%)*                       | 0 (0%)                           | <0.001  |

Statistical significance among 3 groups was determined by one-way ANOVA or Kruskal-Wallis test as appropriate. \*p<0.05 vs. non-MVP with basal inferior-lateral fibrosis; †p<0.05 vs. LGE negative. (For continuous variables, Tukey-Kramer test was used for comparing 2 groups among 3; For categorical variables, Chi-squared test or Fisher's exact test was used as appropriate). LVED(S)V = left ventricular end-diastolic (systolic) volume; LVEF = left ventricular ejection fraction

Table S2. Univariable Cox proportional hazard analysis of arrhythmic event in mitral valve prolapse patients (n=87)

| Variables                                   | HR   | 95% Confidence interval | p value |
|---------------------------------------------|------|-------------------------|---------|
| Age, yrs                                    | 1.01 | 0.99 – 1.03             | 0.37    |
| Sex, male                                   | 1.73 | 0.88 - 3.36             | 0.11    |
| BSA, kg/m <sup>2</sup>                      | 4.10 | 0.96 - 16.6             | 0.057   |
| Short of breath                             | 0.22 | 0.59 - 2.53             | 0.59    |
| Syncope                                     | 2.19 | 1.04 – 4.58             | 0.038   |
| NYHA functional classification ≥ II         | 1.01 | 0.44 – 2.30             | 0.99    |
| Hypertension                                | 1.16 | 0.53 - 2.56             | 0.71    |
| Diabetes                                    | NA   | NA                      | 0.99    |
| Hyperlipidemia                              | 1.47 | 0.75 – 2.89             | 0.27    |
| History of heart failure                    | 1.71 | 0.52 – 5.57             | 0.34    |
| History of atrial fibrillation              | 1.87 | 0.95 - 3.68             | 0.068   |
| History of ventricular arrhythmia           | 2.77 | 1.41 – 5.43             | 0.003   |
| History of cardiac arrest                   | 3.92 | 1.50 – 10.2             | 0.005   |
| β-blocker                                   | 1.30 | 0.68 – 2.51             | 0.43    |
| Antiarrhythmics                             | 2.53 | 1.20 – 5.35             | 0.015   |
| <b>Left ventricular parameters</b>          |      |                         |         |
| LVEDV, ml                                   | 1.01 | 0.99 – 1.02             | 0.058   |
| LVESV, ml                                   | 1.03 | 1.01 – 1.05             | 0.003   |
| Left ventricular ejection fraction, %       | 0.96 | 0.91 – 1.01             | 0.081   |
| Global longitudinal strain, %               | 0.92 | 0.83 – 1.02             | 0.12    |
| Basal posterior Post-systolic shortening, % | 1.01 | 0.99 – 1.01             | 0.11    |
| Basal posterior PSI > 3%                    | 2.24 | 1.13 – 4.44             | 0.018   |
| Mechanical dispersion, %                    | 1.15 | 0.93 – 1.41             | 0.19    |

|                                               |      |             |        |
|-----------------------------------------------|------|-------------|--------|
| Mechanical dispersion > 5.96%                 | 1.48 | 0.72 – 3.05 | 0.28   |
| Double-peak strain pattern                    | 4.81 | 2.22 – 10.4 | <0.001 |
| <b>Mitral valve parameters</b>                |      |             |        |
| Bileaflet involvement                         | 1.40 | 0.70 – 2.81 | 0.34   |
| Superior leaflet displacement, mm             | 1.14 | 1.00 – 1.29 | 0.044  |
| Displacement of papillary muscle, mm          | 1.14 | 1.00 – 1.28 | 0.047  |
| Mitral annular disjunction                    | 2.12 | 1.06 – 4.26 | 0.034  |
| Curling                                       | 1.69 | 0.88 – 3.26 | 0.11   |
| Mitral regurgitation severity $\geq$ moderate | 1.30 | 0.50 – 3.35 | 0.59   |
| <b>Late gadolinium enhancement - CMR</b>      |      |             |        |
| Presence of fibrosis                          | 3.89 | 1.92- 7.88  | <0.001 |
| Medial papillary muscle fibrosis              | 3.32 | 1.45 – 7.18 | 0.004  |
| Lateral papillary muscle fibrosis             | 1.45 | 0.51 – 4.13 | 0.49   |
| LGE quantification, %                         | 1.13 | 1.05 – 1.20 | <0.001 |

Abbreviations are in Table 1.

Table S3a. Univariable Cox proportional hazard analysis of arrhythmic event in mitral valve patient patients undergoing long-term electrocardiographic monitoring (n=58, event n=32)

| Variables                                   | HR   | 95% Confidence interval | p value |
|---------------------------------------------|------|-------------------------|---------|
| Age, yrs                                    | 1.01 | 0.98 – 1.03             | 0.54    |
| Sex, male                                   | 1.65 | 0.81 – 3.36             | 0.16    |
| BSA, kg/m <sup>2</sup>                      | 3.66 | 0.71 – 17.6             | 0.12    |
| Shortness of breath                         | 1.24 | 0.56 – 2.77             | 0.60    |
| Syncope                                     | 1.69 | 0.77 – 3.70             | 0.21    |
| NYHA functional classification $\geq$ II    | 0.99 | 0.41 – 2.43             | 0.99    |
| Hypertension                                | 1.64 | 0.67 – 3.98             | 0.28    |
| Diabetes                                    | NA   | NA                      | NA      |
| Hyperlipidemia                              | 1.17 | 0.55 – 2.51             | 0.68    |
| History of heart failure                    | 1.98 | 0.47 – 8.30             | 0.35    |
| History of atrial fibrillation              | 1.35 | 0.65 – 2.81             | 0.42    |
| History of ventricular arrhythmia           | 2.08 | 1.00 – 4.33             | 0.045   |
| History of cardiac arrest                   | 2.93 | 1.11 – 7.77             | 0.031   |
| $\beta$ -blocker                            | 1.14 | 0.56 – 2.30             | 0.72    |
| Antiarrhythmics                             | 2.02 | 0.93 – 4.36             | 0.074   |
| <b>Left ventricular parameters</b>          |      |                         |         |
| LVEDV, ml                                   | 1.01 | 0.99 – 1.02             | 0.082   |
| LVESV, ml                                   | 1.03 | 1.01 – 1.05             | 0.006   |
| Left ventricular ejection fraction, %       | 0.97 | 0.93 – 1.02             | 0.26    |
| Global longitudinal strain, %               | 0.93 | 0.83 – 1.04             | 0.21    |
| Basal posterior Post-systolic shortening, % | 1.00 | 0.99 – 1.01             | 0.26    |
| Basal posterior PSI > 3%                    | 2.24 | 1.13 – 4.44             | 0.021   |
| Mechanical dispersion, %                    | 1.20 | 0.96 – 1.49             | 0.11    |
| Mechanical dispersion > 5.96%               | 1.62 | 0.76 – 3.49             | 0.21    |
| Double-peak strain pattern                  | 5.41 | 2.18 – 13.4             | <0.001  |
| <b>Mitral valve parameters</b>              |      |                         |         |
| Bileaflet involvement                       | 1.95 | 0.93 – 4.05             | 0.076   |
| Superior leaflet displacement, mm           | 1.19 | 1.02 – 1.39             | 0.022   |
| Displacement of papillary muscle, mm        | 1.29 | 1.08 – 1.54             | 0.004   |



|                                               |      |             |        |
|-----------------------------------------------|------|-------------|--------|
| Mitral annular disjunction                    | 2.21 | 1.04 – 4.68 | 0.039  |
| Curling                                       | 1.75 | 0.87 – 3.50 | 0.12   |
| Mitral regurgitation severity $\geq$ moderate | 1.78 | 0.68 – 4.63 | 0.24   |
| <b>Late gadolinium enhancement - CMR</b>      |      |             |        |
| Presence of fibrosis                          | 4.78 | 1.93 – 11.8 | <0.001 |
| Medial papillary muscle fibrosis              | 3.16 | 1.31 – 7.58 | 0.010  |
| Lateral papillary muscle fibrosis             | 2.30 | 0.79 – 6.68 | 0.13   |
| LGE quantification, %                         | 1.12 | 1.04 – 1.19 | 0.002  |

Abbreviations are in Table 1.

Table S3b. Multivariable Cox proportional hazard analysis of arrhythmic event in mitral valve prolapse patients undergoing long-term electrocardiographic monitoring (n=58, event n=32)

| variables                            | Hazard ratio | 95% Confidence interval | p value |
|--------------------------------------|--------------|-------------------------|---------|
| Model 1                              |              |                         |         |
| Fibrosis                             | 3.47         | 1.53 – 7.86             | 0.003   |
| History of cardiac arrest            | 1.84         | 0.68 – 4.98             | 0.23    |
| Model 2                              |              |                         |         |
| Fibrosis                             | 3.52         | 1.61 – 7.72             | 0.002   |
| Left ventricular end-systolic volume | 1.02         | 1.00 – 1.04             | 0.016   |
| Model 3                              |              |                         |         |
| Fibrosis                             | 3.37         | 1.47 – 7.69             | 0.004   |
| Superior leaflet displacement        | 1.11         | 0.94 – 1.30             | 0.22    |
| Model 4                              |              |                         |         |
| Fibrosis                             | 3.74         | 1.63 – 8.59             | 0.002   |
| Mechanical dispersion                | 1.05         | 0.83 – 1.31             | 0.69    |
| Model 5                              |              |                         |         |
| Fibrosis                             | 3.91         | 1.64 – 9.31             | 0.002   |
| Curling                              | 1.01         | 0.47 – 2.16             | 0.99    |
| Model 6                              |              |                         |         |
| Fibrosis                             | 3.43         | 1.51 – 7.78             | 0.003   |
| Mitral annular disjunction           | 1.61         | 0.74 – 3.51             | 0.23    |
| Model 7                              |              |                         |         |
| Fibrosis                             | 2.05         | 0.83 – 5.03             | 0.12    |
| Double-peak strain pattern           | 3.67         | 1.31 – 10.3             | 0.013   |
| Model 8                              |              |                         |         |
| Fibrosis                             | 3.87         | 1.72 – 8.71             | <0.001  |
| History of arrhythmia                | 1.95         | 0.93 – 4.10             | 0.078   |
| Model 9                              |              |                         |         |
| Fibrosis                             | 2.02         | 0.81 – 5.07             | 0.13    |
| Double-peak strain pattern           | 3.60         | 1.26 – 10.3             | 0.017   |
| History of arrhythmia                | 1.86         | 0.88 – 3.93             | 0.10    |

Table S4. Intra- and inter-observer variability

| variables | Intra-observer $\kappa$ -statistics | Inter-observer $\kappa$ -statistics |
|-----------|-------------------------------------|-------------------------------------|
| Curling   | 0.737                               | 0.737                               |

|                            |                                    |                                    |
|----------------------------|------------------------------------|------------------------------------|
| Mitral annular disjunction | 0.737                              | 0.865                              |
| Double-peak strain pattern | 0.857                              | 0.732                              |
|                            | Intraclass correlation coefficient | Interclass correlation coefficient |
| Global longitudinal strain | 0.908                              | 0.835                              |
| Mechanical dispersion      | 0.812                              | 0.749                              |

### **Supplemental Video legends**

Video S1. A representative echocardiogram demonstrating systolic curling motion

Systolic curling is characterized by exaggerated apical systolic motion of the posterior mitral valve annulus and inward excursion of the adjacent posterobasal myocardium along with papillary muscle traction tugged by superior leaflet displacement

Video S2. Speckle-tracking echocardiography at 3-chamber view on the myocardium with the mitral annular disjunction.
